# Supplementary material
Source: PubMed Central journal article supplement (PMC5831435)
Supplement: jamasurg-152-1148-s001.pdf [file jamasurg-152-1148-s001.pdf]

## Supplementary Online Content

Lindquist SAI, Shah N, Overgaard C, et al. Association of previous cesarean delivery with surgical complications after a hysterectomy later in life. *JAMA Surg*. Published online August 9, 2017. doi:10.1001/jamasurg.2017.2825

**eTable 1.** Summary of Diagnosis and Surgical Codes

**eTable 2.** Adjusted Odds Ratio for Reoperation, Complications, and Blood Transfusion Stratified by Route of Hysterectomy

This supplementary material has been provided by the authors to give readers additional information about their work.

**eTable 1.** Summary of Diagnosis and Surgical Codes

|                                   | <b>Variable</b>                       | <b>Codes</b>                                                                                                                                                                                                                                                                                                                                                                                                                                                                                   |
|-----------------------------------|---------------------------------------|------------------------------------------------------------------------------------------------------------------------------------------------------------------------------------------------------------------------------------------------------------------------------------------------------------------------------------------------------------------------------------------------------------------------------------------------------------------------------------------------|
| <b>Mode of child birth</b>        | Cesarean section                      | NCSP: KMCA, 63620, 65190, 66060, 78000, 78100, 78300                                                                                                                                                                                                                                                                                                                                                                                                                                           |
|                                   | Vaginal Birth                         | ICD-10: DO80-DO84. ICD-8: 65000-66100.                                                                                                                                                                                                                                                                                                                                                                                                                                                         |
| <b>Hysterectomy</b>               | Abdominal hysterectomy                | KLCD00, KLCD30                                                                                                                                                                                                                                                                                                                                                                                                                                                                                 |
|                                   | Vaginal hysterectomy                  | KLCD10, KLCD40                                                                                                                                                                                                                                                                                                                                                                                                                                                                                 |
|                                   | Laparoscopic hysterectomy             | KLCD01, KLCD04, KLCD11, KLCD31, KLCD97                                                                                                                                                                                                                                                                                                                                                                                                                                                         |
| <b>Comorbidities</b>              | Diabetes                              | ICD-10: DE10-14. ICD-8: 250. ACT:A10                                                                                                                                                                                                                                                                                                                                                                                                                                                           |
|                                   | Chronic obstructive pulmonary disease | ICD-10: DJ42-43. ICD-8: 491-492.                                                                                                                                                                                                                                                                                                                                                                                                                                                               |
|                                   | Hypertension                          | ICD-10: DI10-13, DI15. ICD-8: 400-404. ACT: C02A-D, C02L, C03A,B,D,E,X, C07A-F, C08,G, C09A-D,X.                                                                                                                                                                                                                                                                                                                                                                                               |
|                                   | Cardio vascular disease               | ICD-10: DI110, DI21-22, DI49, DI63-63, DI652, DI74, DJ819, DG458-459. ICD-8: 410, 4270-4271, 4273-4276, 4279, 433-438, 444.                                                                                                                                                                                                                                                                                                                                                                    |
|                                   | Breast cancer                         | DC50                                                                                                                                                                                                                                                                                                                                                                                                                                                                                           |
|                                   | Colon cancer                          | DC18, DC20                                                                                                                                                                                                                                                                                                                                                                                                                                                                                     |
|                                   | Pelvic inflammatory disease           | DN70-77                                                                                                                                                                                                                                                                                                                                                                                                                                                                                        |
|                                   | Endometriosis                         | DN80                                                                                                                                                                                                                                                                                                                                                                                                                                                                                           |
| <b>Previous abdominal surgery</b> | Laparoscopic surgery                  | NCSP: KJAA11, KJAA97, KJAB11, KJAD11, KJAD97, KJAF11, KJAH01, KJAH21, KJAK01, KJAK04, KJAL01, KJAL11, KJAL21, KJAL97, KJAP01, KJAW97, KJBC01, KJDF11, KJDF21, KJEA01, KJFA71,KJFW97, KJKA11, KJKA21, KLAA01, KLAA11, KLAB01, KLAB11, KLAB21, KLAB97, KLAC01, KLAC11, KLAC21, KLAC31, KLAD01, KLAE11, KLAE21, KLAF01, KLAF11, KLAG01, KLAG21, KLAW97, KLBB01, KLBC11, KLBC21, KLBD01, KLBE01, KLBF01, KLBF31, KLBF51, KLBF61, KLBW97, KLGA11, KLGA21, KLGA97, KLWE01                            |
|                                   | Laparotomic surgery                   | NCSP: KJAA00, KJAA10, KJAA96, KJAB00, KJAB10, KJAB30, KJAB96, KJAC10, KJAC30, KJAD10, KJAD30, KJAE10, KJAF10, KJAF30, KJAG00, KJAG96, KJAH00, KJAH30, KJAJ00, KJAL20, KJAL30, KJAL96, KJALP00, KJAW96, KJBA10, KJDF20, KJEA00, KJEA10, KJEW96, KJFA00, KJFA96, KJFA98, KJFB00, KJFB20, KJFB43, KJFF10, KJFG00, KJFG20, KJFG70, KJFH00, KJFH10, KJFK00, KJFK20, KJFL10, KJFL20, KJJA10, KJJB20, KJJB30, KJKA20, KJKE06, KJMA10, KJWB00, KJWC00, KJWW97, KKAC00, KKAD10, KKAJ00, KKBH20, KKBW96, |

|                    |                             |                                                                                                                                                                                                                                                                                                          |
|--------------------|-----------------------------|----------------------------------------------------------------------------------------------------------------------------------------------------------------------------------------------------------------------------------------------------------------------------------------------------------|
|                    |                             | KKCD30, KKDD10, KKDG20, KKDG30, KKDW96, KKKW96, KLAA00, KLAA96, KLAC00, KLAC10, KLAC20, KLAC30, KLAC96, KLAD00, KLAE10, KLAF00, KLAF10, KLAW96, KLBA98, KLC20, KLBC96, KLBC97, KLBD00, KLBE00, KLBFO0, KLBFB30, KLBFB60, KLBFB70, KLBW96, KLGA00, KLGA10, KLGA20, KLGA96, KLWB00, KLWC00, KLWE00, KLWW96 |
| <b>Indications</b> |                             |                                                                                                                                                                                                                                                                                                          |
|                    | Fibroids                    | DD25                                                                                                                                                                                                                                                                                                     |
|                    | Menstrual disorder          | DN92, DN84                                                                                                                                                                                                                                                                                               |
|                    | Prolapse/incontinence       | DN393, DN394, DN81, DR32                                                                                                                                                                                                                                                                                 |
|                    | Endometriosis               | DN80                                                                                                                                                                                                                                                                                                     |
|                    | Precancerous lesions        | DD06, DD070, DN850, DN87                                                                                                                                                                                                                                                                                 |
|                    | Pain                        | DN941, DN946, DR102                                                                                                                                                                                                                                                                                      |
| <b>Outcome</b>     |                             |                                                                                                                                                                                                                                                                                                          |
| Reoperation        | Gynecological procedures    | KLAC, KLAD01, KLAE10, KLAF, KLDW96, KLEA10, KLEE00, KLEF00, KLEW, KLWA00, KLWB00, KLWC00-01, KLWD00, KLWE00, KLWF00, KLWW, KTLA00, KTLE20, KTLW99                                                                                                                                                        |
|                    | Gastrointestinal procedures | KJAA00A, KJAE10,30, KJAG60, KJAH, KJAK, KJAP, KJAW97, KJDE00, KJEA, KJFA, KJFB00, KJFF, KJFG20, KJFH00, KJFK, KJGB30, KJHB, KJHD00, KJKA21, KJKE, KJKF10, KJWA00, KJWF00, KJWW96, KTJA, KUJD, KUJF, KJUG02, KUJH02, KUJK02                                                                               |
|                    | Urological procedures       | KKAJ00, KKBH, KKB10, KKBV, KKV10, KKCF02, KKCH, KKKA20A, KTKA10A, KTKK00, KUKB02, KUKC02, KUKD02                                                                                                                                                                                                         |
|                    |                             |                                                                                                                                                                                                                                                                                                          |
| Complications      | Bleeding                    | DT810                                                                                                                                                                                                                                                                                                    |
|                    | Infection                   | DT814                                                                                                                                                                                                                                                                                                    |
|                    | perioperative lesions       | DT812                                                                                                                                                                                                                                                                                                    |
|                    | Adhesions/wound ruptur      | DT813, DN992-4, DN998                                                                                                                                                                                                                                                                                    |
|                    | Acute cystitis              | DN300                                                                                                                                                                                                                                                                                                    |
|                    | Unspecified complications   | DT818, DT819, DN999                                                                                                                                                                                                                                                                                      |

**eTable 2.** Adjusted Odds Ratio for Reoperation, Complications, and Blood Transfusion Stratified by Route of Hysterectomy

---

| Outcome           | Route of hysterectomy | Adjusted odds ratio | 95% CI    | P-value |
|-------------------|-----------------------|---------------------|-----------|---------|
| Reoperation       | Abdominal             | 1.00                | -         | -       |
|                   | Vaginal               | 0.75                | 0.58-0.96 | 0.024   |
|                   | Laparoscopic          | 0.81                | 0.61-1.08 | 0.145   |
| Complications     | Abdominal             | 1.00                | -         | -       |
|                   | Vaginal               | 0.98                | 0.83-1.15 | 0.789   |
|                   | Laparoscopic          | 1.44                | 1.21-1.72 | <0.001  |
| Blood transfusion | Abdominal             | 1.00                | -         | -       |
|                   | Vaginal               | 1.23                | 0.87-1.75 | 0.242   |
|                   | Laparoscopic          | 1.70                | 1.19-2.43 | 0.004   |
